# Supplementary material for: Cardiometabolic risk factors and metabolic syndrome based on severity of obesity in Korean children and adolescents: data from the Korea National Health and Nutrition Examination Survey 2007–2018
Source: PubMed Central journal article supplement — Ann Pediatr Endocrinol Metab. 2022 Jun 20;27(4):289–99. doi: 10.6065/apem.2142230.115 (PMC9816464; doi:10.6065/apem.2142230.115), 2022-06-20
Supplement: apem-2142230-115-suppl1.pdf [file apem-2142230-115-suppl1.pdf]

**Supplementary Table 1. Trends of obesity among Korean children and adolescents in KNHANES 2017-2018**

| Sex   | BMI category      | 2007–2009 (n=2,973) | 2010–2012 (n=2,706) | 2013–2015 (n=2,234) | 2016–2018 (n=2,071) | P-value |
|-------|-------------------|---------------------|---------------------|---------------------|---------------------|---------|
| Total | Normal weight     | 2,416 (81.11)       | 2,202 (81.36)       | 1,779 (79.84)       | 1,623 (78.74)       | 0.025   |
|       | Overweight        | 310 (10.26)         | 254 (9.16)          | 224 (9.39)          | 209 (9.29)          |         |
|       | Class I obesity   | 200 (6.91)          | 203 (7.45)          | 169 (7.71)          | 184 (9.01)          |         |
|       | Class II obesity  | 42 (1.55)           | 42 (1.87)           | 49 (2.42)           | 49 (2.62)           |         |
|       | Class III obesity | 5 (0.17)            | 5 (0.16)            | 13 (0.65)           | 6 (0.33)            |         |
| Boys  | Normal weight     | 1,242 (79.08)       | 1,154 (80.98)       | 944 (78.40)         | 821 (77.4)          | 0.105   |
|       | Overweight        | 174 (10.99)         | 144 (9.29)          | 125 (9.62)          | 119 (9.78)          |         |
|       | Class I obesity   | 118 (7.63)          | 113 (7.43)          | 92 (7.58)           | 102 (8.93)          |         |
|       | Class II obesity  | 27 (2.10)           | 28 (2.11)           | 35 (3.54)           | 32 (3.50)           |         |
|       | Class III obesity | 3 (0.21)            | 3 (0.20)            | 10 (0.86)           | 3 (0.40)            |         |
| Girls | Normal weight     | 1,774 (83.41)       | 1,048 (81.80)       | 835 (81.44)         | 802 (80.2)          | 0.508   |
|       | Overweight        | 136 (9.45)          | 110 (9.01)          | 99 (9.13)           | 90 (8.77)           |         |
|       | Class I obesity   | 82 (6.10)           | 90 (7.49)           | 77 (7.86)           | 82 (9.10)           |         |
|       | Class II obesity  | 15 (0.93)           | 14 (1.59)           | 14 (1.16)           | 17 (1.68)           |         |
|       | Class III obesity | 2 (0.13)            | 2 (0.12)            | 3 (0.41)            | 3 (0.26)            |         |

Values are presented as number (%).

KNHANES, Korea National Health and Nutrition Examination Survey; BMI, body mass index.
