# Supplementary material for: Cardiometabolic risk factors and metabolic syndrome based on severity of obesity in Korean children and adolescents: data from the Korea National Health and Nutrition Examination Survey 2007–2018
Source: PubMed Central journal article supplement — Ann Pediatr Endocrinol Metab. 2022 Jun 20;27(4):289–99. doi: 10.6065/apem.2142230.115 (PMC9816464; doi:10.6065/apem.2142230.115), 2022-06-20
Supplement: apem-2142230-115-suppl2.pdf [file apem-2142230-115-suppl2.pdf]

**Supplementary Table 2. Cardiometabolic risk factors based on BMI category and sex**

| CMRF                    | BMI category    | All          |           |         | Boys         |           |         | Girls        |           |         |
|-------------------------|-----------------|--------------|-----------|---------|--------------|-----------|---------|--------------|-----------|---------|
|                         |                 | Participants | Mean±SE   | P-value | Participants | Mean±SE   | P-value | Participants | Mean±SE   | P-value |
| TC (mg/dL)              | NW              | 6,874        | 155.7±0.4 | <0.001  | 3,583        | 151.1±0.5 | <0.001  | 3,291        | 160.9±0.5 | <0.001  |
|                         | OW              | 843          | 161.3±1.1 |         | 473          | 159.1±1.6 |         | 370          | 164.1±1.4 |         |
|                         | Class I OB      | 649          | 167.2±1.3 |         | 362          | 163.8±1.8 |         | 287          | 171.1±1.8 |         |
|                         | Class II/III OB | 183          | 171.3±2.9 |         | 121          | 171.2±3.5 |         | 62           | 171.5±5.5 |         |
| HDL-C (mg/dL)           | NW              | 6,872        | 51.1±0.2  | <0.001  | 3,582        | 49.9±0.2  | <0.001  | 3,290        | 52.4±0.2  | <0.001  |
|                         | OW              | 843          | 47.0±0.3  |         | 473          | 45.3±0.4  |         | 370          | 49.2±0.5  |         |
|                         | Class I OB      | 649          | 44.9±0.4  |         | 362          | 43.8±0.5  |         | 287          | 46.3±0.6  |         |
|                         | Class II/III OB | 183          | 42.0±0.6  |         | 121          | 42.1±0.7  |         | 62           | 41.8±1.1  |         |
| LDL-C (mg/dL)           | NW              | 6,872        | 87.5±0.3  | <0.001  | 3,582        | 84.6±0.4  | <0.001  | 3,290        | 90.8±0.5  | <0.001  |
|                         | OW              | 843          | 93.0±1.1  |         | 473          | 91.1±1.6  |         | 370          | 95.5±1.3  |         |
|                         | Class I OB      | 649          | 100.4±1.1 |         | 421          | 98.6±1.6  |         | 287          | 102.5±1.6 |         |
|                         | Class II/III OB | 183          | 105.4±2.7 |         | 62           | 105.5±3.5 |         | 62           | 105.3±4.3 |         |
| Triglycerides (mg/dL)   | NW              | 6,874        | 71.2±0.5  | <0.001  | 3,583        | 68.5±0.7  | <0.001  | 3,291        | 74.3±0.7  | <0.001  |
|                         | OW              | 843          | 88.9±2.0  |         | 473          | 92.6±3.0  |         | 370          | 84.5±2.5  |         |
|                         | Class I OB      | 649          | 99.3±2.2  |         | 362          | 97.4±2.8  |         | 287          | 101.5±3.4 |         |
|                         | Class II/III OB | 183          | 111.5±4.7 |         | 121          | 110.4±5.7 |         | 62           | 114.0±8.2 |         |
| Non-HDL-C (mg/dL)       | NW              | 6,872        | 103.1±0.4 | <0.001  | 3,582        | 99.7±0.5  | <0.001  | 3,290        | 107.1±0.5 | <0.001  |
|                         | OW              | 843          | 112.8±1.0 |         | 473          | 112.4±1.5 |         | 370          | 113.4±1.4 |         |
|                         | Class I OB      | 649          | 120.8±1.2 |         | 362          | 118.6±1.7 |         | 287          | 123.3±1.8 |         |
|                         | Class II/III OB | 183          | 127.9±2.8 |         | 121          | 127.9±3.3 |         | 62           | 128.0±5.4 |         |
| Systolic BP (mmHg)      | NW              | 8,020        | 105.4±0.1 | <0.001  | 4,161        | 107.3±0.2 | <0.001  | 3,859        | 103.3±0.2 | <0.001  |
|                         | OW              | 997          | 109.7±0.4 |         | 562          | 112.6±0.5 |         | 435          | 106.1±0.5 |         |
|                         | Class I OB      | 756          | 112.4±0.5 |         | 425          | 115.2±0.6 |         | 331          | 109.2±0.7 |         |
|                         | Class II/III OB | 211          | 119.2±0.9 |         | 141          | 121.0±1.1 |         | 70           | 115.2±1.6 |         |
| Diastolic BP (mmHg)     | NW              | 8,020        | 65.3±0.1  | <0.001  | 4,161        | 65.7±0.2  | <0.001  | 3,859        | 64.9±0.2  | <0.001  |
|                         | OW              | 997          | 66.8±0.4  |         | 562          | 67.3±0.5  |         | 435          | 66.2±0.4  |         |
|                         | Class I OB      | 756          | 67.8±0.4  |         | 425          | 68.3±0.6  |         | 331          | 67.3±0.5  |         |
|                         | Class II/III OB | 211          | 72.5±0.8  |         | 141          | 72.5±1.0  |         | 70           | 72.6±1.2  |         |
| Fasting glucose (mg/dL) | NW              | 6,847        | 89.7±0.1  | <0.001  | 3,568        | 90.3±0.1  | <0.001  | 3,279        | 89.0±0.2  | <0.001  |
|                         | OW              | 839          | 91.1±0.3  |         | 471          | 92.1±0.5  |         | 368          | 89.9±0.4  |         |
|                         | Class I OB      | 649          | 91.9±0.6  |         | 361          | 92.1±0.4  |         | 288          | 91.7±1.2  |         |
|                         | Class II/III OB | 182          | 92.8±0.7  |         | 121          | 92.2±0.8  |         | 61           | 94.3±1.5  |         |
| HbA1c (%)               | NW              | 4,128        | 5.39±0.01 | <0.001  | 2,157        | 5.40±0.01 | <0.001  | 1,971        | 5.38±0.01 | <0.001  |
|                         | OW              | 495          | 5.41±0.02 |         | 276          | 5.45±0.03 |         | 219          | 5.35±0.02 |         |
|                         | Class I OB      | 429          | 5.48±0.03 |         | 234          | 5.43±0.02 |         | 195          | 5.53±0.07 |         |
|                         | Class II/III OB | 124          | 5.53±0.03 |         | 81           | 5.52±0.03 |         | 3,843        | 5.55±0.06 |         |

BMI, body mass index; CMRF, cardiometabolic risk factor; SE, standard error; TC, total cholesterol; HDL-C, high-density lipoprotein cholesterol; LDL-C, low-density lipoprotein cholesterol; HbA1c, glycated hemoglobin; BP, blood pressure; NW, normal weight; OW, overweight; OB, obesity.
